# Supplementary material
Source: PubMed Central journal article supplement (PMC4352666)
Supplement: JB.02517-14_zjb999093547so1.pdf [file JB.02517-14_zjb999093547so1.pdf]

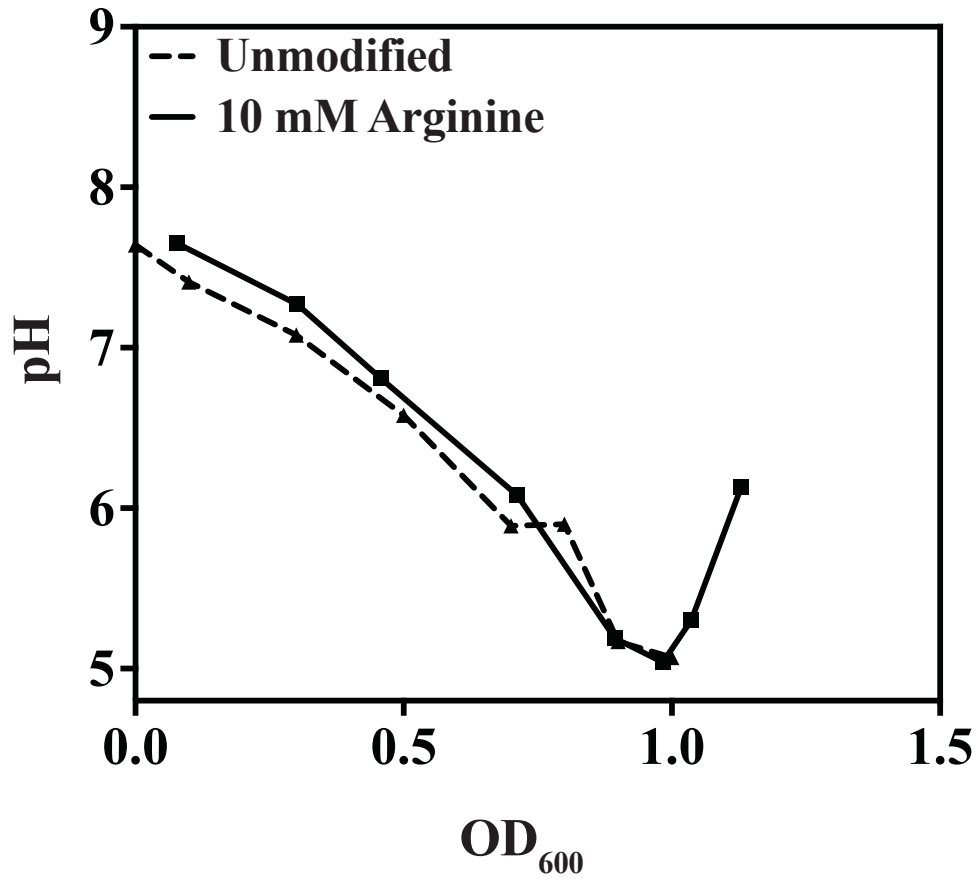

**Figure S1**

**Figure S1: Culture pH decreases with increasing bacterial density.** Wild type bacteria were back-diluted into fresh THY medium with and without 10 mM arginine and grown at 37°C statically under anaerobic conditions. At the designated OD<sub>600</sub> a 2-3 mL aliquot was removed, filter sterilized, and the pH measured using a pH meter.

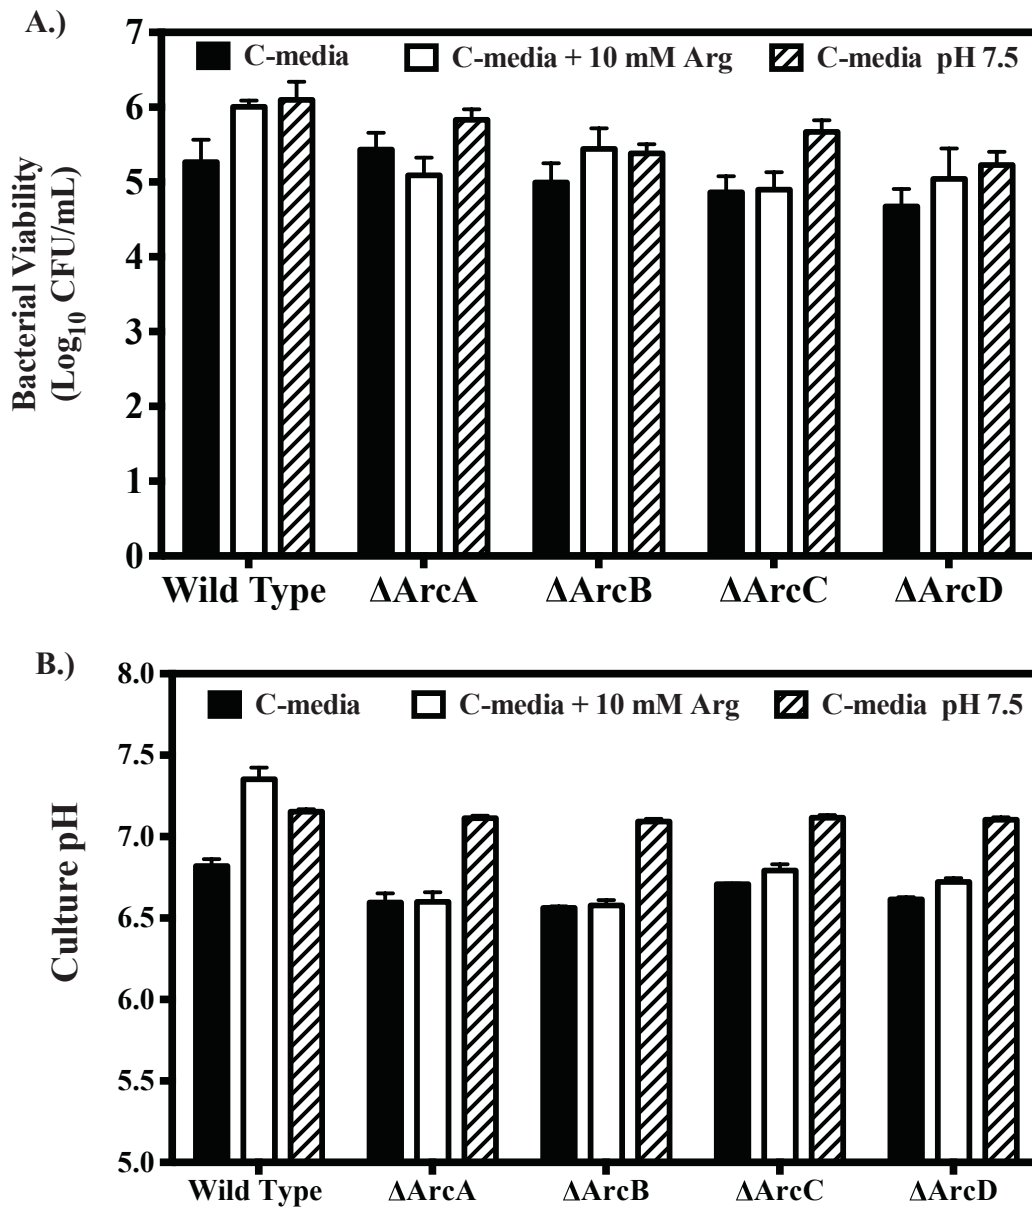

**Figure S2**

**Figure S2: Decrease in bacterial CFUs over time is pH dependent.** Wild type bacteria and the indicated mutants were cultured in C-medium , C-medium + 10 mM Arginine, or C-medium + 100mM HEPES pH 7.5. Cultures were incubated as previously described for 6 days. Following this time period **A.)** bacterial viability and **B.)** the culture pH were measured as described in the published text.

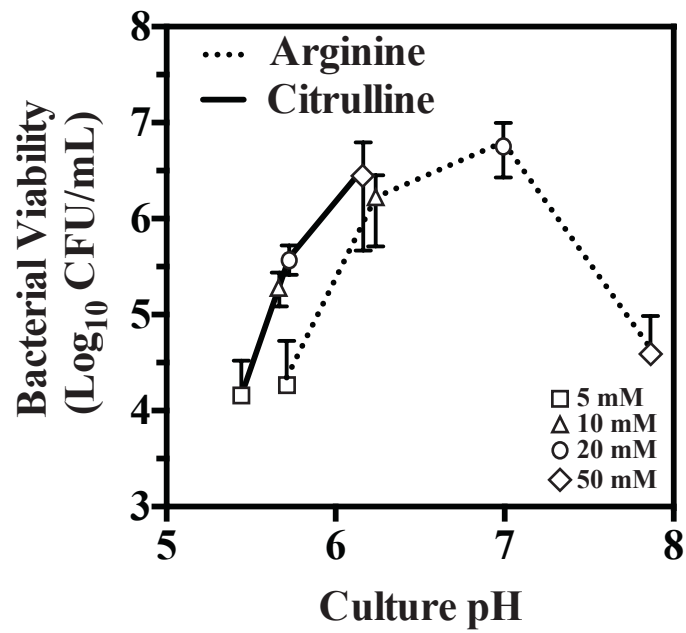

**Figure S3**

**Figure S3 : Utilization of citrulline protects wild type bacteria at lower culture pH.**Data illustrated in Figure 4 and Figure 5 was replotted with the bacterial viability as a function of culture pH. The designated symbols represent the final concentration of arginine or citrulline added to the media.
